# Supplementary material
Source: ML conference proceedings conference paper supplement (https://openaccess.thecvf.com/content/WACV2023/html/Petrovai_MonoDVPS_A_Self-Supervised_WACV_2023_paper.html)
Supplement: Supplementary file 1 [file Petrovai_MonoDVPS_A_Self-Supervised_WACV_2023_supplemental.pdf]

# MonoDVPS: A Self-Supervised Monocular Depth Estimation Approach to Depth-aware Video Panoptic Segmentation

## Supplementary Material

### A. Experiments

#### A.1. Depth-aware Video Panoptic Segmentation

In Table 5 we present a comparison between our MonoDVPS network and concurrent work ViP-DeepLab [1] on the DVPS task. We train our network on the original Cityscapes-DVPS training set and obtain 43.4 DVPQ, while on the extended dataset with panoptic pseudo-labels, we achieve 48.8 DVPQ. We surpass ViP-DeepLab [1] with the ResNet-50 backbone on the DVPQ score, while having a fast inference speed.

| Model           | Backbone  | DVPQ | DVPQ-Things | DVPQ-Stuff | Time (s) |
|-----------------|-----------|------|-------------|------------|----------|
| MonoDVPS        | ResNet-50 | 48.8 | 31.0        | 61.7       | 0.11     |
| MonoDVPS*       | ResNet-50 | 43.4 | 26.2        | 55.9       | 0.11     |
| ViP-DeepLab [1] | ResNet-50 | 42.0 | 27.6        | 51.5       | -        |

Table 5: **DVPS on Cityscapes-DVPS.** MonoDVPS\* is our network trained on the reduced training set (without extension). ViP-DeepLab with ResNet-50 was evaluated with the author’s code [1].

#### A.2. Panoptic-guided Moving Object Masking for Improved Depth Ablation

For each instance in frame  $t$ , we measure the IoU between its mask in the reconstructed panoptic label  $P_{s \rightarrow t}$  and its mask in  $P_t$ . The geometric projection model used for generating  $P_{s \rightarrow t}$  assumes the scene is static and considers only the ego-motion. Therefore, we observe a high overlap between instance masks for static objects and low overlap for moving objects, since object motion was not modeled. We set a threshold  $T$  such that if the IoU is lower than the threshold, the instance is considered a moving object and the pixels corresponding to its mask will be ignored in the photometric loss computation. In Table 6, we experiment with  $T = \{0.3, 0.5, 0.7\}$  and a linear scheduling. We need to consider that errors from warping with optical flow, geometric reconstruction or occlusions could influence the IoU computation. In consequence, a high threshold  $T = 0.7$  removes too many instances, while a low threshold

$T = 0.3$  is too permissive. The linear scheduling obtains the best balance between panoptic and depth performance, with  $T = 0.5$  being a close second.

| IoU threshold | PQ $\uparrow$ | absRel $\downarrow$ |
|---------------|---------------|---------------------|
| 0.3           | 63.2          | 0.099               |
| 0.5           | 63.5          | 0.098               |
| 0.7           | 63.9          | 0.102               |
| <b>linear</b> | <b>63.6</b>   | <b>0.098</b>        |

Table 6: **Moving Object Masking.** Ablation study on the IoU threshold used to determine if an object is moving. *Linear* means that the IoU is decreased linearly from 0.7 with each training iteration.

#### A.3. Panoptic-guided Depth Losses Ablation

In Table 7 we perform an extensive ablation study for depth estimation. We evaluate the depth output of our multi-task depth-aware panoptic segmentation network on the Cityscapes-DVPS dataset. Specifically, we introduce three panoptic-guided depth losses and evaluate their individual contributions. As seen in Table 7, the panoptic-guided triplet loss  $\mathcal{L}_{PCT}$  brings the largest improvement compared to the other two panoptic-guided losses  $\mathcal{L}_{PGS}$  and  $\mathcal{L}_{PED}$ . This could be because  $\mathcal{L}_{PCT}$  is less sensitive to errors in the panoptic predictions due to its patch-based formulation. However, we obtain the best results when all three losses  $\mathcal{L}_{PGS}$ ,  $\mathcal{L}_{PED}$ ,  $\mathcal{L}_{PCT}$  are used during training.

### B. Implementation Details

We adopt the ResNet-50 [4] backbone for the depth-aware video panoptic segmentation network. The network is pretrained on the Cityscapes dataset [2] for image panoptic segmentation. The pose estimation network follows [3] with a ResNet18 backbone and a decoder that predicts the 6DOF camera pose, the translation vector and rotation matrix, as Euler angles. During inference we discard the pose

| Model                                                         | absRel ↓     | sqRel ↓      | RMS ↓        |
|---------------------------------------------------------------|--------------|--------------|--------------|
| MTL Self-Supervised Depth                                     | 0.106        | 0.841        | 5.270        |
| + Loss Balancing                                              | 0.102        | 0.767        | 5.034        |
| + $\mathcal{L}_{PGS}$                                         | 0.101        | 0.781        | 5.010        |
| + $\mathcal{L}_{PED}$                                         | 0.101        | 0.778        | 5.024        |
| + $\mathcal{L}_{PGT}$                                         | 0.100        | 0.757        | 4.998        |
| + $\mathcal{L}_{PGS} + \mathcal{L}_{PED} + \mathcal{L}_{PGT}$ | 0.099        | 0.747        | 4.988        |
| + Moving Objects Masking                                      | 0.098        | 0.701        | 4.864        |
| + <b>Extended dataset</b>                                     | <b>0.082</b> | <b>0.515</b> | <b>4.198</b> |

Table 7: **Panoptic-guided Depth Evaluation.** Results on Cityscapes-DVPS. Ablation study for panoptic-guided depth losses and moving objects masking.

estimation network. During training, we employ a mini-batch of 4 images for 30k iterations, using the Adam optimizer with a base learning rate of  $1e - 3$  for decoders and heads and  $1e - 4$  for the backbone and polynomial learning rate decay. We adopt image augmentation, such as random horizontal flip and random color augmentation: brightness, contrast, saturation and hue jitter. We employ image resolution  $1025 \times 2049$  for Cityscapes-DVPS and  $385 \times 1281$  for SemKITTI-DVPS. For depth evaluation, we center crop the Cityscapes-DVPS image to  $512 \times 1664$ , in order to discard the sky and ego-vehicle regions, following [3].
